# Supplementary material for: The Arginine/Lysine-Rich Element within the DNA-Binding Domain Is Essential for Nuclear Localization and Function of the Intracellular Pathogen Resistance 1
Source: PubMed Central journal article supplement (PMC5021326; doi:10.1371/journal.pone.0162832), 2016-09-13
Supplement: pone.0162832.s001.pdf [file pone.0162832.s001.pdf]

| Primer sequence        | Forward                                          | Reverse                                                                                                                                |
|------------------------|--------------------------------------------------|----------------------------------------------------------------------------------------------------------------------------------------|
| Co-immunoprecipitation |                                                  |                                                                                                                                        |
| p3XFLAG-lpr1-wt        | CG <b>GAATTC</b> AATGTTCACTCTGACCA<br>AAGCCT     | ACT <b>GGTACCG</b> ACTAGGCACCCTTCTT<br>TTGAGG                                                                                          |
| HA-lpr1                | CC <b>GAATTC</b> GGATGTTCACTCTGACCA<br>AAGCCTTG  | CG <b>GGTACC</b> CTAGGCACCCTTCTTTT<br>GAGG                                                                                             |
| HA-lpr1-ΔSP100         | CC <b>GAATTC</b> GGTATACCTACGAAGAGA<br>AAAACAG   | CG <b>GGTACC</b> CTAGGCACCCTTCTTTT<br>GAGG                                                                                             |
| HA-lpr1-ΔSAND          | CC <b>GAATTC</b> GGATGTTCACTCTGACCA<br>AAGCCTTG  | CG <b>GGTACC</b> CTAAGAGAAATCCACA<br>GCGTCATT                                                                                          |
| p3XFLAG-NPI-1          | CG <b>GAATTC</b> AATGTCCACACCAGGAA<br>AAGAGAACTT | ACT <b>GGTACCG</b> ATCAAAGCTGGAAAC<br>CTTCCATAGGA                                                                                      |
| Fluorescence (GFP-C1)  |                                                  |                                                                                                                                        |
| lpr1                   | TTC <b>GAATTC</b> TATGTTCACTCTGACCAA<br>AGCCTTG  | CG <b>GGTACC</b> CTAGGCACCCTTCTTTT<br>GAGG                                                                                             |
| lpr1-108               | TTC <b>GAATTC</b> TTATACCTACGAAGAGA<br>AAAACAG   | CG <b>GGTACC</b> CTAGGCACCCTTCTTTT<br>GAGG                                                                                             |
| lpr1-353               | TTC <b>GAATTC</b> TATGTTCACTCTGACCAA<br>AGCCTTG  | CG <b>GGTACC</b> CTAAGAGAAATCCACA<br>GCGTCATT                                                                                          |
| GST                    | CTC <b>AGATCT</b> ATGTCCCCTATACTAGGT<br>TATTGGA  | TCG <b>AAGCTT</b> GTACGATGCGGCCGC<br>TCGAGTCGA                                                                                         |
| NLS1/2-435             | TTC <b>GAATTC</b> TATGTTCACTCTGACCAA<br>AGCCTTG  | CG <b>GGTACC</b> CTAAAAGGACTTTTGT<br>TCTTT                                                                                             |
| NLS1/2-423             | TTC <b>GAATTC</b> TATGTTCACTCTGACCAA<br>AGCCTTG  | CG <b>GGTACC</b> CTATAATGTCTCCCGT<br>TACAACGTAT                                                                                        |
| NLS1/2-390             | TTC <b>GAATTC</b> TATGTTCACTCTGACCAA<br>AGCCTTG  | CG <b>GGTACC</b> CTACTCATTCTGAATGC<br>ACTTTTTTGA                                                                                       |
| NLS1/2-mut             | TTC <b>GAATTC</b> TATGTTCACTCTGACCAA<br>AGCCTTG  | CG <b>GGTACC</b> CTAGGCACCCTTCTTTT<br>GAGGTTTACTCTTGGAGGTAAGAA<br>CAAAGTCC <u>GGCCTGCTCCAGATGG</u><br><u>GCTAATGTCTCCCCGTTACAACGTA</u> |
| Two steps PCR          |                                                  |                                                                                                                                        |
| ΔcNLS1                 | TTC <b>GAATTC</b> TATGTTCACTCTGACCAA<br>AGCCTTG  | TCCCATCATCTCATCTTGGTTTGCAG<br>GTGTGCAGGG                                                                                               |
|                        | CCCTGCACACCTGCAAACCAAGATGA<br>GATGATGGGA         | CG <b>GGTACC</b> CTAGGCACCCTTCTTTT<br>GAGG                                                                                             |
| ΔcNLS2                 | TTC <b>GAATTC</b> TATGTTCACTCTGACCAA<br>AGCCTTG  | GTTCTTCGTGCTGTGCTACCACTTGT<br>TTTTGATG                                                                                                 |
|                        | CATCAAAAACAAGTGGTAGCACAGC<br>ACGAAGAAC           | CG <b>GGTACC</b> CTAGGCACCCTTCTTTT<br>GAGG                                                                                             |

**S1 Table. Primer sequences for plasmids construction.** Sequences of the primers used for the construction of all plasmids used in this study.
